# Supplementary material for: Differential Adaptation of Human Gut Microbiota to Bariatric Surgery–Induced Weight Loss: Links With Metabolic and Low-Grade Inflammation Markers
Source: PubMed Central journal article supplement — Diabetes. 2010 Sep 28;59(12):3049–57. doi: 10.2337/db10-0253 (PMC2992765; doi:10.2337/db10-0253), 2010-09-28
Supplement: supp_db10-0253_db100253Onlineappendix.pdf [file supp_db10-0253_db100253Onlineappendix.pdf]

## ONLINE APPENDIX

**Supplementary Table 1. Clinical and biological characteristics of the lean controls, obese diabetic and non diabetic subjects before gastric surgery.**

|                                                           | <b>Control</b><br><b>n = 13</b> | <b>OB/nD</b><br><b>n = 23</b> | <b>OB/D</b><br><b>n = 7</b>  |
|-----------------------------------------------------------|---------------------------------|-------------------------------|------------------------------|
| Age (years)                                               | 36 ± 3 <sup>(A)</sup>           | 42 ± 2 <sup>(A, B)</sup>      | 49 ± 5 <sup>(B)</sup>        |
| <b>Adiposity markers</b>                                  |                                 |                               |                              |
| Body Weight (kg)                                          | 59.0 ± 1.9 <sup>(A)</sup>       | 127.4 ± 4.3 <sup>(B)</sup>    | 121.5 ± 11.6 <sup>(B)</sup>  |
| BMI (kg/m <sup>2</sup> )                                  | 21.7 ± 0.4 <sup>(A)</sup>       | 48.3 ± 1.6 <sup>(B)</sup>     | 45.4 ± 3.5 <sup>(B)</sup>    |
| Adipocyte diameter (µm)                                   | nd                              | 115.6 ± 1.7 <sup>(A)</sup>    | 120.1 ± 3.4 <sup>(B)</sup>   |
| REE (kcal)                                                | nd                              | 1830.3 ± 65.2 <sup>(A)</sup>  | 1762.1 ± 85.9 <sup>(A)</sup> |
| Fat mass%                                                 | 26.5 ± 1.4 <sup>(A)</sup>       | 48.2 ± 1.1 <sup>(B)</sup>     | 46.6 ± 2.1 <sup>(B)</sup>    |
| Fat-free mass%                                            | 69.5 ± 1.3 <sup>(A)</sup>       | 49.7 ± 1.1 <sup>(B)</sup>     | 50.9 ± 1.9 <sup>(B)</sup>    |
| Leptin (ng/ml)                                            | 9.24 ± 1.46 <sup>(A)</sup>      | 50.5 ± 4.1 <sup>(B)</sup>     | 52.2 ± 8.3 <sup>(B)</sup>    |
| <b>Plasma glucose homeostasis and insulin sensitivity</b> |                                 |                               |                              |
| Glycaemia (mmol/l)                                        | 4.3 ± 0.2 <sup>(A)</sup>        | 5.4 ± 0.2 <sup>(A)</sup>      | 9.4 ± 1.4 <sup>(B)</sup>     |
| Insulinemia (µU/ml)                                       | 3.8 ± 0.3 <sup>(A)</sup>        | 16.6 ± 1.8 <sup>(B)</sup>     | 19.4 ± 10.9 <sup>(B)</sup>   |
| Adiponectin (µg/ml)                                       | 13 ± 1.43 <sup>(A)</sup>        | 6.8 ± 0.6 <sup>(B)</sup>      | 5.4 ± 0.8 <sup>(B)</sup>     |
| <b>Plasma lipid homeostasis</b>                           |                                 |                               |                              |
| Total cholesterol (mmol/l)                                | 4.8 ± 0.3 <sup>(A)</sup>        | 4.5 ± 0.2 <sup>(A)</sup>      | 4.6 ± 0.3 <sup>(A)</sup>     |
| Total triglycerides (mmol/l)                              | 0.8 ± 0.1 <sup>(A)</sup>        | 1.5 ± 0.2 <sup>(B)</sup>      | 1.8 ± 0.5 <sup>(B)</sup>     |
| HDL cholesterol (mmol/l)                                  | 1.8 ± 0.1 <sup>(A)</sup>        | 1.2 ± 0.1 <sup>(B)</sup>      | 1.3 ± 0.1 <sup>(B)</sup>     |
| <b>Inflammatory markers</b>                               |                                 |                               |                              |
| Plasma hsCRP (mg/dl)                                      | nd                              | 2.7 ± 0.8 <sup>(A)</sup>      | 4.4 ± 2.4 <sup>(A)</sup>     |
| Plasma IL-6 (pg/ml)                                       | nd                              | 4 ± 0.4 <sup>(A)</sup>        | 5.8 ± 1.3 <sup>(A)</sup>     |
| Plasma orosomucoid (g/l)                                  | nd                              | 1.05 ± 0.05 <sup>(A)</sup>    | 0.95 ± 0.08 <sup>(A)</sup>   |

All values are expressed as mean ± SEM; nd: not determined. Fat mass%, Fat-free mass%: values expressed as a percentage of body weight. REE: resting energy expenditure. Wilcoxon Rank Sum tests for changes between the groups. Data not sharing the same letter within a horizontal line are significantly different (P<0.05).

**Supplementary Table 2. Evolution of the clinical and biological characteristics of diabetic (OB/D) and non-diabetic (OB/nD) subjects before surgery, 3 months and 6 months after surgery**

|                                                           | OB/nD (n = 23)               |                              |                              | OB/D (n=7)                   |                               |                              |
|-----------------------------------------------------------|------------------------------|------------------------------|------------------------------|------------------------------|-------------------------------|------------------------------|
|                                                           | Basal                        | 3 months                     | 6 months                     | Basal                        | 3 months                      | 6 months                     |
| <b>Food intake</b>                                        |                              |                              |                              |                              |                               |                              |
| Food intake (kcal)                                        | 2118 ± 111 <sup>(A)</sup>    | 1171 ± 99 <sup>(A)</sup>     | 1406 ± 55 <sup>(B)</sup>     | 1469 ± 69 <sup>(A)</sup>     | 784 ± 94 <sup>(B)</sup>       | 1192 ± 131 <sup>(C)</sup>    |
| <b>Adiposity markers</b>                                  |                              |                              |                              |                              |                               |                              |
| Body Weight (kg)                                          | 127.4 ± 4.3 <sup>(A)</sup>   | 108.0 ± 4.0 <sup>(B)</sup>   | 98.0 ± 3.8 <sup>(C)</sup>    | 121.5 ± 11.6 <sup>(A)</sup>  | 105.3 ± 11.0 <sup>(B)</sup>   | 99.3 ± 10.7 <sup>(C)</sup>   |
| BMI (kg/m <sup>2</sup> )                                  | 48.3 ± 1.6 <sup>(A)</sup>    | 40.9 ± 1.4 <sup>(B)</sup>    | 37.2 ± 1.4 <sup>(C)</sup>    | 45.4 ± 3.5 <sup>(A)</sup>    | 39.3 ± 3.4 <sup>(B)</sup>     | 36.9 ± 3.2 <sup>(C)</sup>    |
| Adipocyte diameter (µm)                                   | 115.6 ± 1.7 <sup>(A)</sup>   | 111.2 ± 1.2 <sup>(B)</sup>   | 101.6 ± 3.9 <sup>(C)</sup>   | 120.1 ± 3.4 <sup>(A)</sup>   | 107.4 ± 1.3 <sup>(A)</sup>    | 109.3 ± 3.7 <sup>(A)</sup>   |
| REE (kcal)                                                | 1830.3 ± 65.2 <sup>(A)</sup> | 1830.3 ± 55.7 <sup>(A)</sup> | 1566.4 ± 49.3 <sup>(B)</sup> | 1762.1 ± 85.9 <sup>(A)</sup> | 1887.3 ± 152.1 <sup>(B)</sup> | 1492.2 ± 80.1 <sup>(C)</sup> |
| Fat mass%                                                 | 48.2 ± 1.1 <sup>(A)</sup>    | 44.9 ± 1.1 <sup>(B)</sup>    | 41.3 ± 1.4 <sup>(C)</sup>    | 46.6 ± 2.1 <sup>(A)</sup>    | 43.3 ± 2.5 <sup>(B)</sup>     | 41.4 ± 2.3 <sup>(C)</sup>    |
| Fat-free mass%                                            | 49.7 ± 1.1 <sup>(A)</sup>    | 52.7 ± 1.0 <sup>(B)</sup>    | 56.0 ± 1.3 <sup>(C)</sup>    | 50.9 ± 1.9 <sup>(A)</sup>    | 53.9 ± 2.3 <sup>(B)</sup>     | 55.6 ± 2.0 <sup>(C)</sup>    |
| Leptin (ng/ml)                                            | 50.5 ± 4.1 <sup>(A)</sup>    | 24.1 ± 2.5 <sup>(B)</sup>    | 23.0 ± 2.6 <sup>(B)</sup>    | 52.2 ± 8.3 <sup>(A)</sup>    | 30.0 ± 6.4 <sup>(B)</sup>     | 30.4 ± 8.6 <sup>(B)</sup>    |
| <b>Plasma glucose homeostasis and insulin sensitivity</b> |                              |                              |                              |                              |                               |                              |
| Glycaemia (mmol/l)                                        | 5.4 ± 0.2 <sup>(A)</sup>     | 4.8 ± 0.1 <sup>(B)</sup>     | 4.6 ± 0.1 <sup>(B)</sup>     | 9.6 ± 1.7 <sup>(A)</sup>     | 5.6 ± 0.6 <sup>(B)</sup>      | 5.5 ± 0.6 <sup>(B)</sup>     |
| HbA1C (%)                                                 | 5.8 ± 0.1 <sup>(A)</sup>     | 5.6 ± 0.1 <sup>(B)</sup>     | 5.6 ± 0.1 <sup>(B)</sup>     | 8.5 ± 1.3 <sup>(A)</sup>     | 6.4 ± 0.3 <sup>(B)</sup>      | 6.4 ± 0.2 <sup>(B)</sup>     |
| Insulinemia (mmol/l)                                      | 16.6 ± 1.8 <sup>(A)</sup>    | 9.5 ± 1.0 <sup>(B)</sup>     | 6.3 ± 0.8 <sup>(C)</sup>     | 8.4 ± 1.7 <sup>(A)</sup>     | 8.0 ± 1.4 <sup>(A)</sup>      | 5.6 ± 0.7 <sup>(A)</sup>     |
| HOMA-B%                                                   | 67.0 ± 2.8 <sup>(A)</sup>    | 77.3 ± 2.6 <sup>(B)</sup>    | 89.8 ± 6.0 <sup>(C)</sup>    | 40.3 ± 8.4 <sup>(A)</sup>    | 65.8 ± 7.7 <sup>(A)</sup>     | 74.2 ± 15.0 <sup>(A)</sup>   |
| HOMA-S%                                                   | 145.4 ± 6.3 <sup>(A)</sup>   | 168.6 ± 5.7 <sup>(B)</sup>   | 180.3 ± 21.3 <sup>(B)</sup>  | 81.5 ± 20.7 <sup>(A)</sup>   | 142.7 ± 17.3 <sup>(A)</sup>   | 148.7 ± 25.7 <sup>(A)</sup>  |
| HOMA-IR                                                   | 0.7 ± 0.04 <sup>(A)</sup>    | 0.6 ± 0.02 <sup>(B)</sup>    | 0.8 ± 0.11 <sup>(A)</sup>    | 1.6 ± 0.40 <sup>(A)</sup>    | 0.8 ± 0.10 <sup>(A)</sup>     | 0.7 ± 0.10 <sup>(A)</sup>    |
| Adiponectin (µg/ml)                                       | 6.8 ± 0.6 <sup>(A)</sup>     | 7.5 ± 0.7 <sup>(A)</sup>     | 8.4 ± 0.7 <sup>(B)</sup>     | 5.4 ± 0.8 <sup>(A)</sup>     | 8.7 ± 1.9 <sup>(A)</sup>      | 8.4 ± 2.3 <sup>(A)</sup>     |
| <b>Plasma lipid homeostasis</b>                           |                              |                              |                              |                              |                               |                              |
| Total cholesterol (mmol/l)                                | 4.53 ± 0.18 <sup>(A)</sup>   | 4.23 ± 0.19 <sup>(A)</sup>   | 4.31 ± 0.17 <sup>(A)</sup>   | 4.59 ± 0.31 <sup>(A,B)</sup> | 4.23 ± 0.23 <sup>(A)</sup>    | 4.47 ± 0.26 <sup>(B)</sup>   |
| Triglycerides (mmol/l)                                    | 1.50 ± 0.19 <sup>(A)</sup>   | 1.47 ± 0.18 <sup>(A)</sup>   | 1.42 ± 0.16 <sup>(A)</sup>   | 1.81 ± 0.52 <sup>(A)</sup>   | 1.77 ± 0.47 <sup>(A)</sup>    | 1.70 ± 0.55 <sup>(A)</sup>   |
| HDL cholesterol (mmol/l)                                  | 1.21 ± 0.06 <sup>(A,B)</sup> | 1.15 ± 0.06 <sup>(A)</sup>   | 1.28 ± 0.06 <sup>(B)</sup>   | 1.27 ± 0.1 <sup>(A)</sup>    | 1.23 ± 0.18 <sup>(A)</sup>    | 1.36 ± 0.2 <sup>(A)</sup>    |
| <b>Inflammatory markers</b>                               |                              |                              |                              |                              |                               |                              |
| hsCRP (mg/dl)                                             | 2.7 ± 0.8 <sup>(A)</sup>     | 2.9 ± 1.2 <sup>(A)</sup>     | 2.9 ± 1.0 <sup>(A)</sup>     | 4.4 ± 2.4 <sup>(A)</sup>     | 1.2 ± 0.6 <sup>(A)</sup>      | 1.9 ± 0.7 <sup>(A)</sup>     |
| IL-6 (pg/ml)                                              | 4 ± 0.4 <sup>(A)</sup>       | 4.3 ± 0.4 <sup>(A)</sup>     | 3.7 ± 0.4 <sup>(A)</sup>     | 5.8 ± 1.3 <sup>(A)</sup>     | 3.8 ± 0.6 <sup>(A)</sup>      | 2.7 ± 0.5 <sup>(A)</sup>     |
| Orosomucoide (g/l)                                        | 1.05 ± 0.05 <sup>(A)</sup>   | 0.94 ± 0.04 <sup>(A,B)</sup> | 0.88 ± 0.04 <sup>(B)</sup>   | 0.95 ± 0.08 <sup>(A)</sup>   | 0.92 ± 0.09 <sup>(A)</sup>    | 0.81 ± 0.05 <sup>(A)</sup>   |

All values are expressed as mean ± SEM. Fat mass%, Fat-free mass%: values expressed as a percentage of body weight. REE: resting energy expenditure). HOMA: homeostasis model assessment; HOMA-B%: estimate the pancreatic β-cell function; HOMA-S%: evaluate the insulin sensitivity and HOMA-IR: represent the insulin resistance. Paired wilcoxon tests for changes in these parameters between various time points.

† Comparison in 5 diabetic subjects without insulin injection, exogenous insulin may introduce a wrong interpretation of the HOMA test. Data not sharing the same letter within a horizontal line are significantly different (P<0.05).

**Supplementary Table 3. Composition of microbiota compared in diabetic (OB/D) and non-diabetic (OB/nD) subjects before surgery, and 3 months and 6 months after surgery.**

|              | <i>All-Bacteria</i> <sup>*</sup> | <i>Firmicutes</i>                               |                                                                 |                                              |                                                           | <i>Bacteroidetes</i>                       |                                                  |                                     |
|--------------|----------------------------------|-------------------------------------------------|-----------------------------------------------------------------|----------------------------------------------|-----------------------------------------------------------|--------------------------------------------|--------------------------------------------------|-------------------------------------|
|              |                                  | <i>Clostridium coccoides</i> group <sup>†</sup> | <i>Lactobacillus/Leuconostoc/Pediococcus</i> group <sup>†</sup> | <i>Clostridium leptum</i> group <sup>†</sup> | <i>Fecalibacterium prausnitzii</i> species <sup>†,‡</sup> | <i>Bifido-bacterium</i> genus <sup>†</sup> | <i>Bacteroides/Prevotella</i> group <sup>†</sup> | <i>E. coli</i> species <sup>†</sup> |
| <b>OB/nD</b> |                                  |                                                 |                                                                 |                                              |                                                           |                                            |                                                  |                                     |
| M0 (23)      | 11.29 ± 0.1                      | - 1.58 ± 0.2 <sup>A</sup>                       | - 2.75 ± 0.3 <sup>A</sup>                                       | - 0.86 ± 0.3 <sup>A</sup>                    | - 1.45 ± 0.2 <sup>A</sup>                                 | - 2.37 ± 0.2 <sup>A</sup>                  | - 1.61 ± 0.1 <sup>A</sup>                        | - 3.42 ± 0.3 <sup>A</sup>           |
| M3 (20)      | 11.00 ± 0.2                      | - 1.90 ± 0.1 <sup>A</sup>                       | - 3.26 ± 0.2 <sup>B</sup>                                       | - 1.04 ± 0.3 <sup>A</sup>                    | - 1.85 ± 0.2 <sup>B</sup>                                 | - 3.10 ± 0.2 <sup>B</sup>                  | - 0.91 ± 0.1 <sup>B</sup>                        | - 1.76 ± 0.2 <sup>B</sup>           |
| M6 (11)      | 11.09 ± 0.2                      | - 1.50 ± 0.3 <sup>A</sup>                       | - 3.57 ± 0.3 <sup>B</sup>                                       | - 0.37 ± 0.2 <sup>A</sup>                    | - 1.40 ± 0.1 <sup>A</sup>                                 | - 2.85 ± 0.3 <sup>B</sup>                  | - 1.02 ± 0.2 <sup>B</sup>                        | - 2.13 ± 0.3 <sup>A</sup>           |
| <b>OB/D</b>  |                                  |                                                 |                                                                 |                                              |                                                           |                                            |                                                  |                                     |
| M0 (7)       | 11.17 ± 0.1                      | - 1.46 ± 0.4 <sup>A</sup>                       | - 2.62 ± 0.5 <sup>A</sup>                                       | - 1.63 ± 0.8 <sup>A</sup>                    | - 2.79 ± 0.5 <sup>B</sup>                                 | - 2.22 ± 0.4 <sup>A</sup>                  | - 1.61 ± 0.2 <sup>A</sup>                        | - 2.49 ± 0.3 <sup>A</sup>           |
| M3 (6)       | 10.73 ± 0.4                      | - 1.92 ± 0.7 <sup>A</sup>                       | - 2.81 ± 0.3 <sup>A</sup>                                       | - 0.69 ± 0.5 <sup>A</sup>                    | - 1.78 ± 0.7 <sup>B</sup>                                 | - 2.45 ± 0.2 <sup>A</sup>                  | - 0.86 ± 0.4 <sup>A</sup>                        | - 1.18 ± 0.3 <sup>A</sup>           |
| M6 (4)       | 10.99 ± 0.2                      | - 1.70 ± 0.2 <sup>A</sup>                       | - 3.63 ± 0.4 <sup>A</sup>                                       | - 0.57 ± 0.3 <sup>A</sup>                    | - 1.82 ± 0.4 <sup>B</sup>                                 | - 3.06 ± 0.7 <sup>A</sup>                  | - 0.75 ± 0.1 <sup>A</sup>                        | - 1.27 ± 0.2 <sup>A</sup>           |

Number in parentheses represents the numbers of studied samples.

Control: healthy female volunteers, OB/nD: obese subjects without diabetes, OB/D: obese subjects with diabetes,

Data not sharing the same letter within a column are significantly different (P<0.05) to the human population.

\* All-Bacteria results obtained by qPCR were expressed as mean of the log<sub>10</sub> value ± SEM.

† Results were expressed as mean of the log<sub>10</sub> value ± SEM of normalized data, calculated as the log no. of targeted bacteria minus the log of all-bacteria number.

‡ *Faecalibacterium prausnitzii* is the major component of the *Clostridium leptum* group.

**Supplementary Table 4. Correlation between clinical parameters and microbiota before and after gastric surgery.**

A Correlation before gastric surgery.

B Dynamic correlation during the follow-up after gastric surgery.

A

|                                     | Body weight | BMI | Body fat mass | Adipocyte diameter   | Leptin | Fasting glucose       | HbA1C                 | Insulin              | HOMA-IR               | hs CRP                | IL-6                  | orosomucoid |
|-------------------------------------|-------------|-----|---------------|----------------------|--------|-----------------------|-----------------------|----------------------|-----------------------|-----------------------|-----------------------|-------------|
| <i>Bacteroides /Prevotella</i>      |             |     |               |                      |        |                       |                       |                      |                       |                       |                       |             |
| OB/nD + OB/D                        | NS          | NS  | NS            | NS                   | NS     | NS                    | NS                    | NS                   | NS                    | NS                    | NS                    | NS          |
| OB/nD                               | NS          | NS  | NS            | R <sub>s</sub> 0.52* | NS     | NS                    | NS                    | NS                   | NS                    | R <sub>s</sub> -0.43* | NS                    | NS          |
| <i>C. leptum</i>                    |             |     |               |                      |        |                       |                       |                      |                       |                       |                       |             |
| OB/nD + OB/D                        | NS          | NS  | NS            | NS                   | NS     | R <sub>s</sub> -0.39* | NS                    | NS                   | R <sub>s</sub> -0.39* | R <sub>s</sub> -0.44* | NS                    | NS          |
| OB/nD                               | NS          | NS  | NS            | NS                   | NS     | NS                    | NS                    | NS                   | NS                    | R <sub>s</sub> -0.43* | NS                    | NS          |
| <i>C.coccoides</i>                  |             |     |               |                      |        |                       |                       |                      |                       |                       |                       |             |
| OB/nD + OB/D                        | NS          | NS  | NS            | R <sub>s</sub> 0.39* | NS     | NS                    | NS                    | NS                   | NS                    | NS                    | NS                    | NS          |
| OB/nD                               | NS          | NS  | NS            | NS                   | NS     | NS                    | NS                    | NS                   | NS                    | NS                    | NS                    | NS          |
| <i>E. coli</i>                      |             |     |               |                      |        |                       |                       |                      |                       |                       |                       |             |
| OB/nD + OB/D                        | NS          | NS  | NS            | NS                   | NS     | NS                    | R <sub>s</sub> 0.36*  | NS                   | NS                    | NS                    | NS                    | NS          |
| OB/nD                               | NS          | NS  | NS            | NS                   | NS     | NS                    | NS                    | R <sub>s</sub> 0.52* | NS                    | NS                    | NS                    | NS          |
| <i>Faecalibacterium prausnitzii</i> |             |     |               |                      |        |                       |                       |                      |                       |                       |                       |             |
| OB/nD + OB/D                        | NS          | NS  | NS            | NS                   | NS     | R <sub>s</sub> -0.47* | R <sub>s</sub> -0.39* | NS                   | R <sub>s</sub> -0.47* | R <sub>s</sub> -0.54† | R <sub>s</sub> -0.65‡ | NS          |
| OB/nD                               | NS          | NS  | NS            | NS                   | NS     | NS                    | NS                    | NS                   | NS                    | R <sub>s</sub> -0.58† | R <sub>s</sub> -0.60† | NS          |

\* p< 0.05, † p< 0.01, ‡ p< 0.001

## B

|                                                     | Body weight | BMI       | Body fat mass | Leptin    | Calorie intake | Fasting glucose | Insulin   | Adiponectin | hsCRP     | IL-6      | Orosomucoid |
|-----------------------------------------------------|-------------|-----------|---------------|-----------|----------------|-----------------|-----------|-------------|-----------|-----------|-------------|
| <b><i>Bacteroides /Prevotella</i></b>               |             |           |               |           |                |                 |           |             |           |           |             |
| OB/nD + OB/D                                        | Rs -0.33†   | Rs -0.35† | Rs -0.32†     | Rs -0.43† | Rs -0.33*      | Rs -0.28*       | NS        | NS          | Rs -0.27* | NS        | Rs -0.31*   |
| OB/nD                                               | Rs -0.3*    | Rs -0.3*  | NS            | Rs -0.39† | Rs -0.39*      | Rs -0.36*       | NS        | NS          | Rs -0.32* | NS        |             |
| <b><i>C.leptum</i></b>                              |             |           |               |           |                |                 |           |             |           |           |             |
| OB/nD + OB/D                                        | NS          | NS        | NS            | NS        | NS             | NS              | NS        | NS          | Rs -0.31* | NS        | NS          |
| OB/nD                                               | NS          | NS        | NS            | NS        | NS             | NS              | NS        | NS          | Rs -0.29* | NS        | NS          |
| <b><i>Faecalibacterium prausnitzii</i></b>          |             |           |               |           |                |                 |           |             |           |           |             |
| OB/nD + OB/D                                        | NS          | NS        | NS            | NS        | NS             | NS              | NS        | NS          | Rs -0.39† | Rs -0.35† | Rs -0.32*   |
| OB/nD                                               | NS          | NS        | NS            | NS        | NS             | NS              | NS        | NS          | Rs -0.37† | Rs -0.34† | Rs -0.30*   |
| <b><i>E. coli</i></b>                               |             |           |               |           |                |                 |           |             |           |           |             |
| OB/nD + OB/D                                        | Rs -0.42‡   | Rs -0.47§ | Rs -0.41‡     | Rs -0.53¶ | Rs -0.47‡      | NS              | NS        | NS          | NS        | NS        | Rs -0.38†   |
| OB/nD                                               | Rs -0.41†   | Rs -0.47‡ | Rs -0.45‡     | Rs -0.55§ | Rs -0.44†      | Rs -0.35*       | Rs -0.22* | Rs -0.33*   | NS        | NS        | Rs -0.37*   |
| <b><i>Bifidobacterium</i></b>                       |             |           |               |           |                |                 |           |             |           |           |             |
| OB/nD + OB/D                                        | Rs 0.19†    | Rs 0.17†  | NS            | Rs 0.34†  | Rs 0.28*       | NS              | Rs 0.30*  | NS          | Rs 0.29*  | NS        | Rs 0.36†    |
| OB/nD                                               | NS          | NS        | NS            | NS        | NS             | NS              | Rs 0.29*  | NS          | NS        | NS        | Rs 0.36*    |
| <b><i>Lactobacillus/Leuconostoc/Pediococcus</i></b> |             |           |               |           |                |                 |           |             |           |           |             |
| OB/nD + OB/D                                        | NS          | NS        | NS            | NS        | Rs 0.29*       | Rs 0.24*        | Rs 0.28*  | NS          | NS        | NS        | NS          |
| OB/nD                                               | NS          | NS        | NS            | NS        | Rs 0.30†       | NS              | Rs 0.30*  | NS          | NS        | NS        | NS          |

\* p&lt; 0.05, † p&lt; 0.01, ‡ p&lt; 0.001, §p&lt; 0.0001, ¶p&lt; 0.00001

**Supplementary Table 5. Day to day variations for 7 bacterial groups from 5 lean subjects**

|                | <i>E.coli</i> | <i>Bacteroides/Pr<br/>evotella</i> | <i>Bifidobacterium</i> | <i>Lactobacillus/<br/>Pediococcus</i> | <i>F. prausnitzii</i> | <i>C leptum</i> | <i>C coccoides</i> |
|----------------|---------------|------------------------------------|------------------------|---------------------------------------|-----------------------|-----------------|--------------------|
| <b>D1</b>      | -4.01±0.86    | -1.1±0.25                          | -2.35±0.17             | -4.04±0.37                            | -0.8±0.32             | 0.27±0.53       | -1.49±0.33         |
| <b>D2</b>      | -3.8±0.54     | -0.94±0.42                         | -2.55±0.37             | -4±0.5                                | -0.87±0.25            | -0.11±0.33      | -1.81±0.2          |
| <b>p value</b> | 1             | 0.8125                             | 0.8125                 | 0.625                                 | 1                     | 0.3125          | 0.0625             |

Values are expressed as mean ± SEM; (n=5). D1: first day, D2: second day. Paired Wilcoxon stands for analyzing parameters changes between various time points.

**Supplementary Table 6. Group and species-specific 16S rRNA-targeted primers and probes.**

| <i>Target organism</i>                       | <i>Primer and probe</i> | <i>Sequence 5'-3'</i>                 |
|----------------------------------------------|-------------------------|---------------------------------------|
| <i>All-Bacteria</i> (*)                      | F_Bact 1369             | CGG TGA ATA CGT TCC CGG               |
|                                              | R_Prok1492              | TAC GGC TAC CTT GTT ACG ACT T         |
|                                              | <b>P_TM1389F</b>        | <b>6FAM-CTT GTA CAC ACC GCC CGT C</b> |
| <i>C. leptum</i>                             | F_Clept 09              | CCT TCC GTG CCG SAG TTA               |
|                                              | R_Clept 08              | GAA TTA AAC CAC ATA CTC CAC TGC TT    |
|                                              | <b>P-Clep 01</b>        | <b>6FAM-CAC AAT AAG TAA TCC ACC</b>   |
| <i>Bifidobacterium</i>                       | F_Bifid 09c             | CGG GTG AGT AAT GCG TGA CC            |
|                                              | R_Bifid 06              | TGA TAG GAC GCG ACC CCA               |
|                                              | <b>P_Bifid</b>          | <b>6FAM-CTC CTG GAA ACG GGT G</b>     |
| <i>C. coccoides</i>                          | F_Ccoc 07               | GAC GCC GCG TGA AGG A                 |
|                                              | R_Ccoc 14               | AGC CCC AGC CTT TCA CAT C             |
|                                              | <b>P_Erec482(*)</b>     | <b>VIC-CGG TAC CTG ACT AAG AAG</b>    |
| <i>Bacteroides/Prevotella</i>                | F_Bacter 11             | CCT WCG ATG GAT AGG GGT T             |
|                                              | R_Bacter 08             | CAC GCT ACT TGG CTG GTT CAG           |
|                                              | <b>P_Bac303(*)</b>      | <b>VIC-AAG GTC CCC CAC ATT G</b>      |
| <i>E. coli</i>                               | E.coli F                | CAT GCC GCG TGT ATG AAG AA            |
|                                              | E.coli R                | CGG GTA ACG TCA ATG AGC AAA           |
| <i>Lactobacillus/Leuconostoc/Pediococcus</i> | F_Lacto 05              | AGC AGT AGG GAA TCT TCC A             |
|                                              | R_Lacto 04              | CGC CAC TGG TGT TCY TCC ATA TA        |
| <i>F. prausnitzii</i>                        | Fprau 07                | CCA TGA ATT GCC TTC AAA ACT GTT       |
|                                              | Fprau 02                | GAG CCT CAG CGT CAG TTG GT            |

(\*) modified from reference

Primers and probes used in this study are as previously described (16;17). Probe sequences are in bold.

**Supplementary Figure 1: Dynamic evolution of *F. prausnitzii* population levels from M0 to M3 and M6 after gastric surgery in obese diabetic (OB/D) and non-diabetic (OB/nD) subjects.**

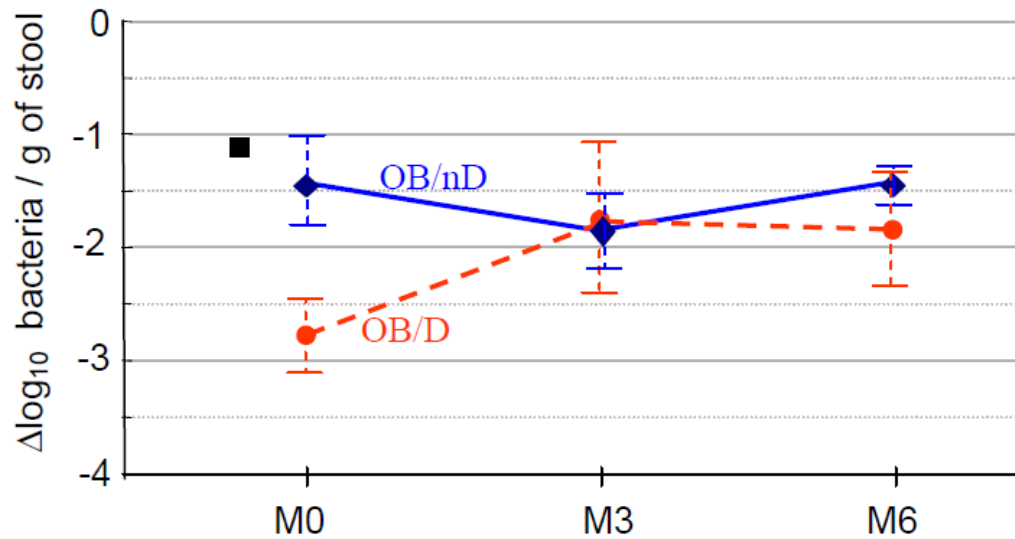

■ Average *F. prausnitzii* population levels in control subjects.

Results were expressed as mean  $\pm$  SEM of the  $\Delta\log_{10}$  value of normalized data, calculated as the log number of targeted bacteria minus the log number of All-Bacteria.
